# Supplementary material for: Soybean GmMYB73 promotes lipid accumulation in transgenic plants
Source: PubMed Central journal article supplement (PMC3998039; doi:10.1186/1471-2229-14-73), 2014-03-24
Supplement: 1471-2229-14-73-S2.pdf [file 1471-2229-14-73-S2.pdf]

**Additional file 2.** Eight small regions in *AtPLD a 1-4* used for GL2 binding analysis

|               |                                                    |
|---------------|----------------------------------------------------|
| AtPLD a 1-4-1 | ATAACGATATAATTGTGGTTGGATTATGTTATCTCACATCCTAATAGTAA |
| AtPLD a 1-4-2 | CTAATAGTAATATTTTACGTTACATCTAAAATTATATAATAGAGTGAAAA |
| AtPLD a 1-4-3 | TAGAGTGAAAAAGATAAAAATGGAAAGTTTAGTGACTAATTGAAAACTTG |
| AtPLD a 1-4-4 | GAAAATCTTGAAAAGTTTTAAGAAGCCGACATAAAAAAGGAAATAAAT   |
| AtPLD a 1-4-5 | GGAAATAAATATTCAAAGTTGAATAAAATCCCTGACTTGAGGATAGGGG  |
| AtPLD a 1-4-6 | GGATAGGGGAGACAAAAAAAAAAGAGATATCCAAATCGTGCGCCCGAC   |
| AtPLD a 1-4-7 | TGCGCCCGACGTTCTGCATCCAACGTTACGACATCGTTCCCAAGCTGA   |
| AtPLD a 1-4-8 | TCCCAAGCTGAATCCTCACCGTCCATCACAAGAAACTATA           |
